# Supplementary material for: Reliability of self-sampling for accurate assessment of respiratory virus viral and immunologic kinetics
Source: PubMed Central journal article supplement (PMC7276008; doi:10.1101/2020.04.03.20051706), 2020-04-06
Supplement: NIHPP2020.04.03.20051706-supplement-1.pdf [file NIHPP2020.04.03.20051706-supplement-1.pdf]

## Supplemental Figure 1

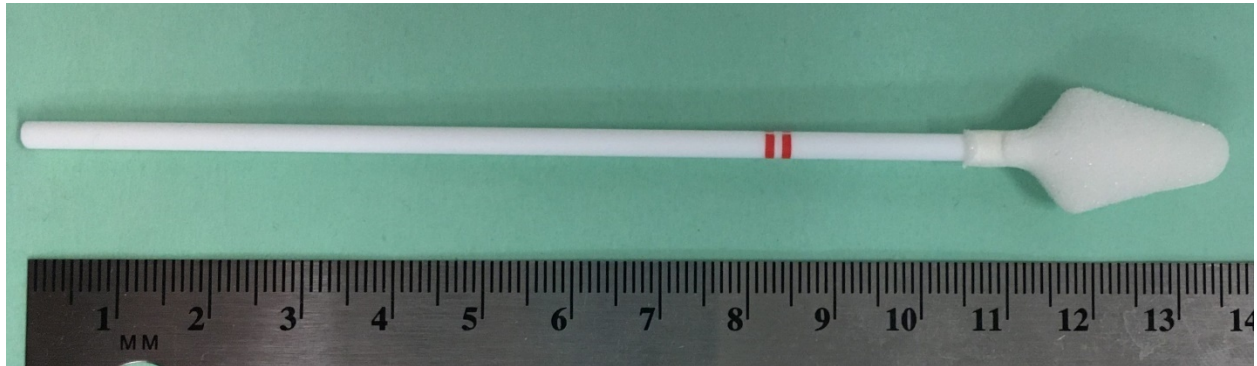

## Supplemental Figure 2

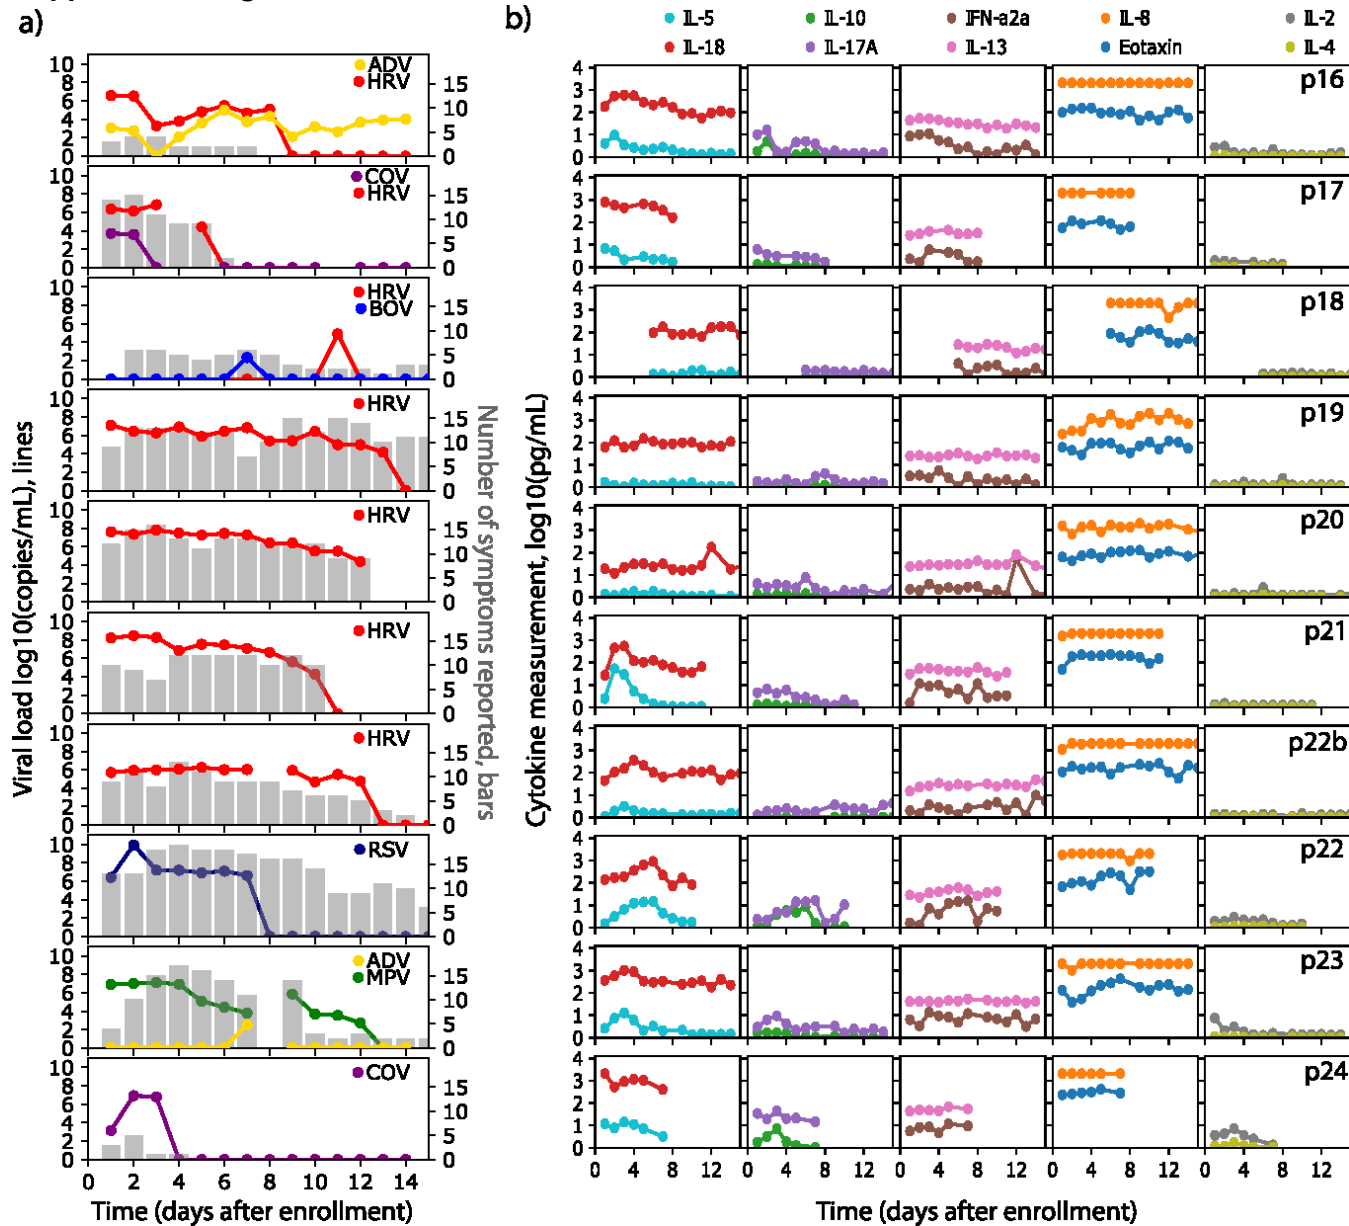

### Supplemental Figure 3

a)

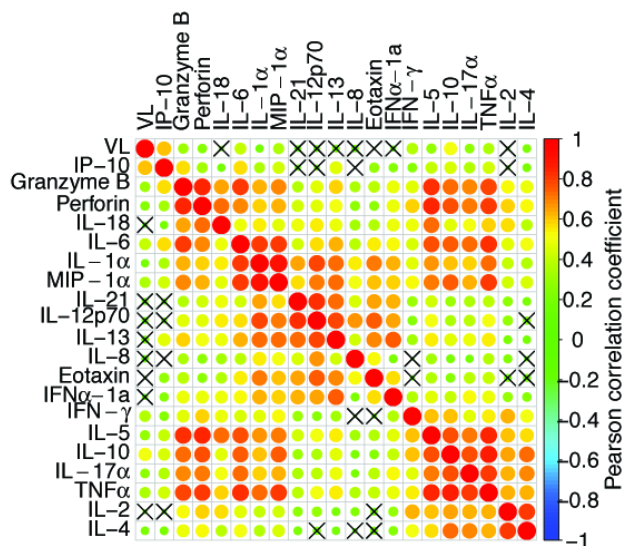

b)

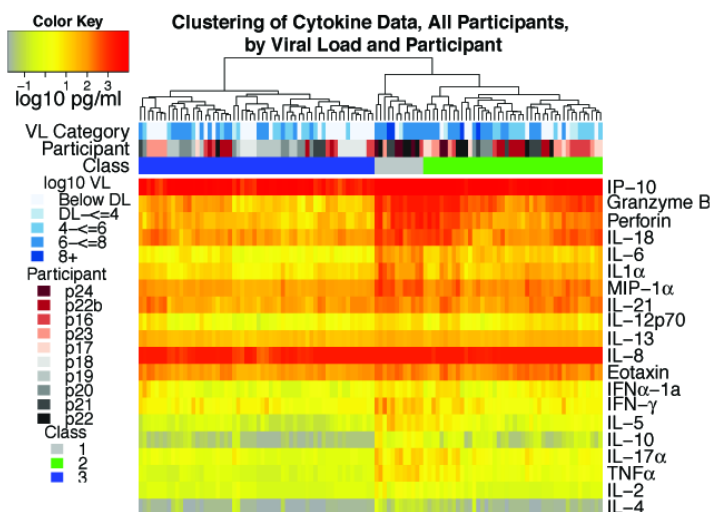

### Supplemental Figure 4

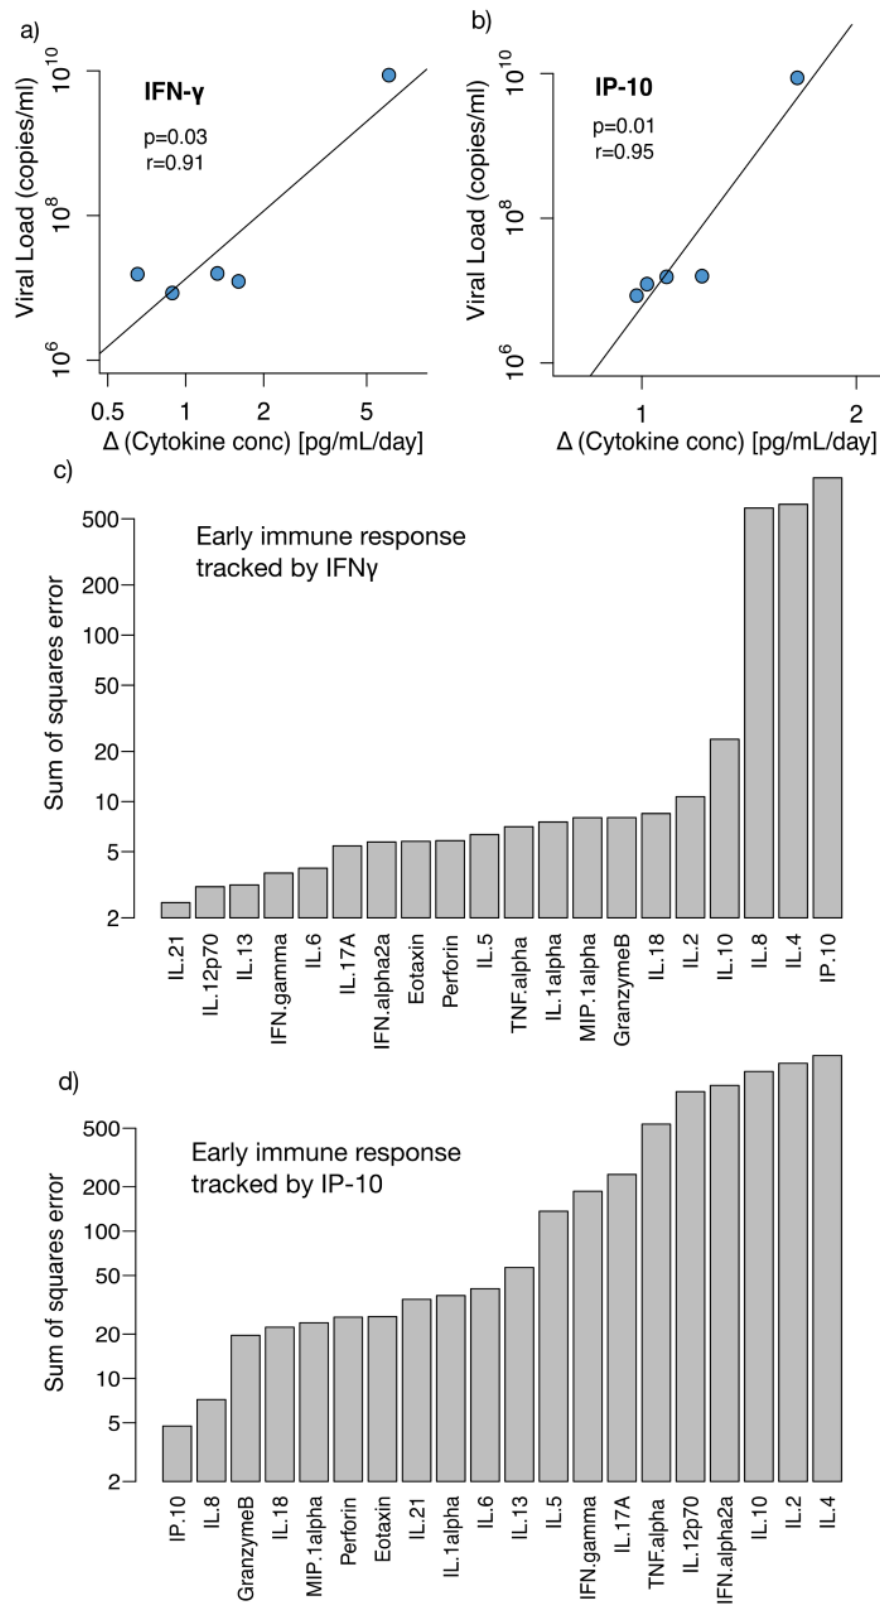

## Supplemental Figure 5

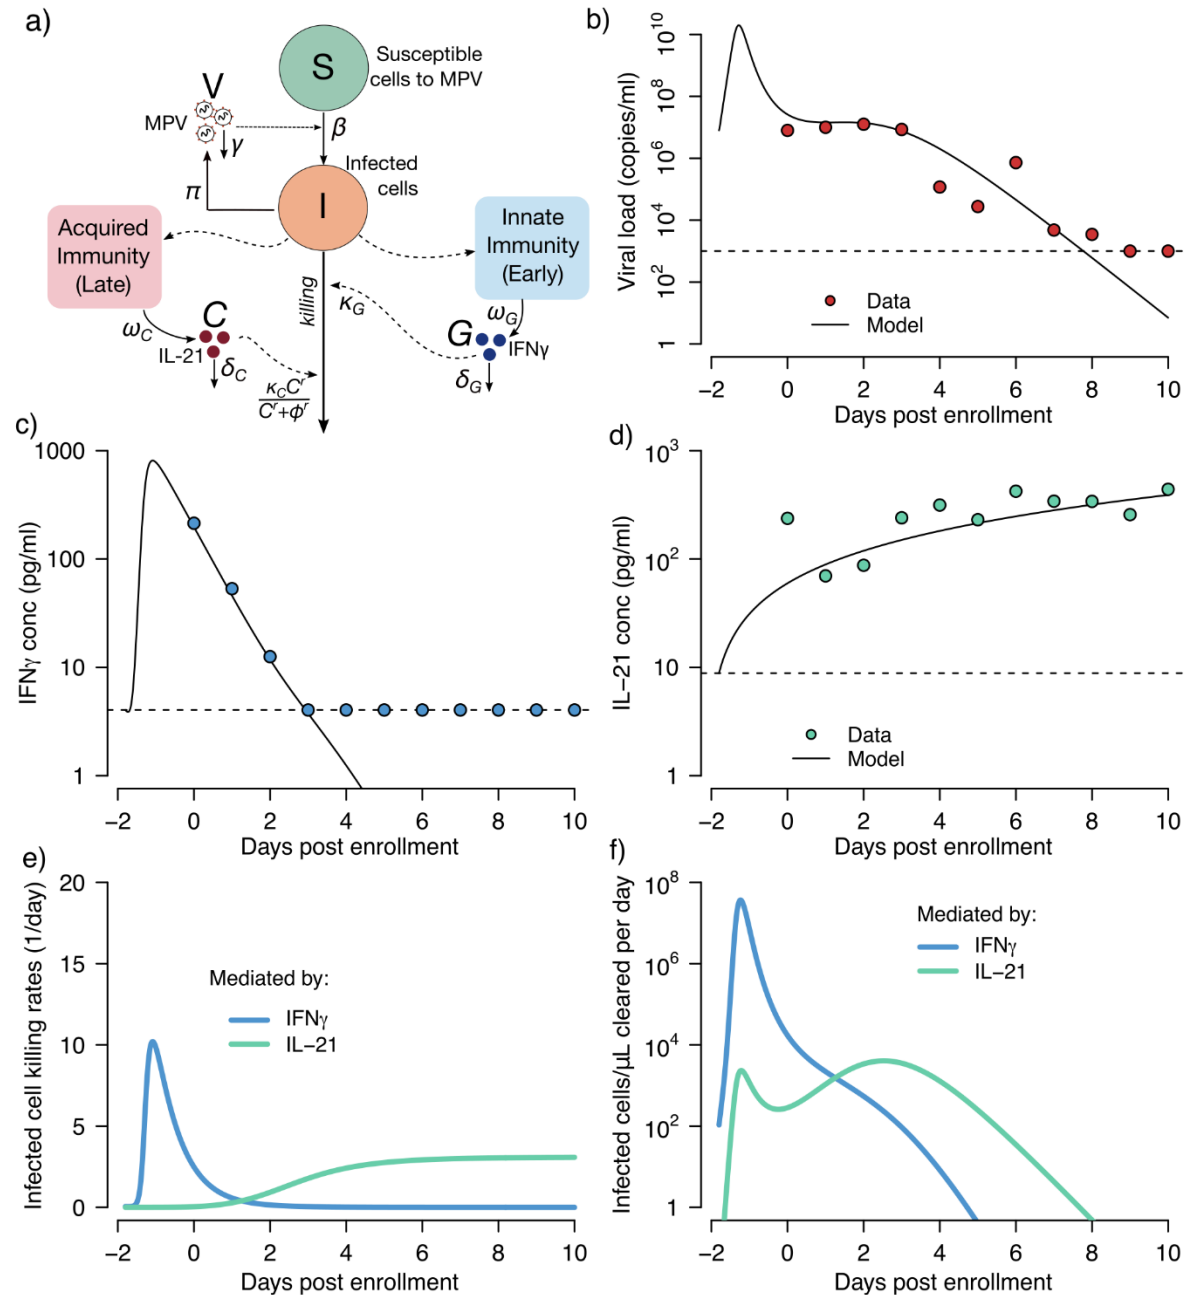

**Supplemental Table 1: Symptom survey administered at enrollment (foam vs flocked swab comparison study) and daily (longitudinal sampling study).**

| <b>Symptom Category</b> | <b>Specific symptom</b>     |
|-------------------------|-----------------------------|
| <b>Nose</b>             | Runny nose                  |
|                         | Congestion                  |
|                         | Post-nasal drip             |
|                         | Sinus Pain                  |
|                         | Sneezing                    |
| <b>Eyes</b>             | Watery/burning eyes         |
| <b>Ears</b>             | Ear pain                    |
| <b>Throat</b>           | Sore throat                 |
|                         | Hoarseness                  |
| <b>Chest</b>            | Cough                       |
|                         | Phlegm production           |
|                         | Wheezing or chest tightness |
|                         | Shortness of breath         |
|                         | Chest pain                  |
| <b>Gastrointestinal</b> | Diarrhea                    |
|                         | Nausea                      |
|                         | Stomach pain                |
|                         | Vomiting                    |
| <b>General</b>          | Fatigue                     |
|                         | Fever                       |
|                         | Chills                      |
|                         | Headache                    |
|                         | Aching muscles              |
| <b>Sleep Changes</b>    | Sleep Disruption            |
| <b>Sensory Changes</b>  | Change in smell             |
|                         | Change in taste             |

**Supplemental Table 2A: Foam versus foam swab concordance in left nostril.**

|           | Flocked Swab |          |          |       |
|-----------|--------------|----------|----------|-------|
|           |              | Positive | Negative | Total |
| Foam Swab | Positive     | 4        | 2        | 6     |
|           | Negative     | 2        | 7        | 9     |
|           | Total        | 6        | 9        | 15    |

**Supplemental Table 2B: Foam versus foam swab concordance in right nostril.**

|           | Flocked Swab |          |          |       |
|-----------|--------------|----------|----------|-------|
|           |              | Positive | Negative | Total |
| Foam Swab | Positive     | 5        | 3        | 8     |
|           | Negative     | 1        | 6        | 7     |
|           | Total        | 6        | 9        | 15    |

**Supplemental Table 2C: Foam versus foam swab concordance with results from left and right nostril combined.**

|           | Flocked Swab |          |          |       |
|-----------|--------------|----------|----------|-------|
|           |              | Positive | Negative | Total |
| Foam Swab | Positive     | 9        | 5        | 14    |
|           | Negative     | 3        | 13       | 16    |
|           | Total        | 12       | 18       | 30    |
